# Supplementary material
Source: PubMed Central journal article supplement (PMC11067718)
Supplement: NIHMS1983014-supplement-Supplement.pdf [file NIHMS1983014-supplement-Supplement.pdf]

## Supplemental Material

| Supplemental Table 1. Parenteral Vasoactive Medications Used in the Management of Cardiogenic Shock in Older Patients |                                              |                 |           |           |                   |                      |      |          |                                                                                                                                                                |
|-----------------------------------------------------------------------------------------------------------------------|----------------------------------------------|-----------------|-----------|-----------|-------------------|----------------------|------|----------|----------------------------------------------------------------------------------------------------------------------------------------------------------------|
| Medication                                                                                                            | Typical Dosage                               | Target Receptor |           |           |                   | Pharmacologic Action |      |          | Additional Notes                                                                                                                                               |
|                                                                                                                       |                                              | $\alpha 1$      | $\beta 1$ | $\beta 2$ | Other             | Chronotropy          | SVR  | Inotropy |                                                                                                                                                                |
| Norepinephrine                                                                                                        | 0.01-1 $\mu\text{g}/\text{kg}/\text{min}$    | ↑↑↑↑            | ↑↑        | ↑↑        |                   | ↑                    | ↑↑↑↑ | ↑↑       | In a subgroup analysis of the SOAP II trial, CS patients on Dopamine had higher mortality than those on Norepinephrine.                                        |
| Dopamine                                                                                                              | 1-5 $\mu\text{g}/\text{kg}/\text{min}$       |                 | ↑         |           | Dopamine Receptor | ↑                    | ↓    | ↑        |                                                                                                                                                                |
|                                                                                                                       | 5-20 $\mu\text{g}/\text{kg}/\text{min}$      | ↑               | ↑↑↑       | ↑         |                   | ↑↑                   | ↑↑   | ↑↑↑      |                                                                                                                                                                |
| Epinephrine                                                                                                           | 0.01-0.03 $\mu\text{g}/\text{kg}/\text{min}$ | ↑               | ↑↑        | ↑↑        |                   | ↑↑                   | ↑    | ↑↑↑↑     | Greater incidence of refractory shock compared with Norepinephrine among post-MI CS patients in Optima CC trial.                                               |
|                                                                                                                       | 0.04-0.5 $\mu\text{g}/\text{kg}/\text{min}$  | ↑↑↑↑            | ↑↑        | ↑↑        |                   | ↑↑↑                  | ↑↑↑↑ | ↑↑↑↑     |                                                                                                                                                                |
| Vasopressin                                                                                                           | 0.01-0.04 U/min                              |                 |           |           | V1 Receptor       |                      | ↑    |          | Preferentially increases SVR, while sparing PVR.                                                                                                               |
| Dobutamine                                                                                                            | 2-20 $\mu\text{g}/\text{kg}/\text{min}$      | ↑               | ↑↑↑       | ↑↑        |                   | ↑↑                   | ↓↓   | ↑↑↑      | In patients with CS from the DOREMI trial, no significant difference between Dobutamine and Milrinone was seen in the primary composite or secondary outcomes. |
| Milrinone                                                                                                             | 0.125-0.5 $\mu\text{g}/\text{kg}/\text{min}$ |                 |           |           | PDE-3 Inhibition  | ↑                    | ↓↓   | ↑↑↑      | Excreted primarily through kidney – caution when using in patients with renal dysfunction.                                                                     |

**Abbreviations:** CS, cardiogenic shock; kg, kilogram; min, minute; PDE, phosphodiesterase; PVR, pulmonary vascular resistance; SVR, systemic vascular resistance.
